# Supplementary material for: Pembrolizumab plus axitinib versus sunitinib in metastatic renal cell carcinoma: outcomes of Japanese patients enrolled in the randomized, phase III, open-label KEYNOTE-426 study
Source: PubMed Central journal article supplement (PMC8732816; doi:10.1007/s10147-021-02014-7), 2021-11-20
Supplement: 10147_2021_2014_MOESM1_ESM.pdf [file 10147_2021_2014_MOESM1_ESM.pdf]

## SUPPLEMENTAL TABLES AND FIGURES

Pembrolizumab Plus Axitinib versus Sunitinib in Metastatic Renal Cell Carcinoma: Outcomes of Japanese Patients Enrolled in the Randomized, Phase 3, Open-Label KEYNOTE 426 Study

Satoshi Tamada,<sup>1</sup> Chihiro Kondoh,<sup>2</sup> Nobuaki Matsubara,<sup>3</sup> Ryuichi Mizuno,<sup>4</sup> Go Kimura,<sup>5</sup> Satoshi Anai,<sup>6</sup> Yoshihiko Tomita,<sup>7</sup> Masafumi Oyama,<sup>8</sup> Naoya Masumori,<sup>9</sup> Takahiro Kojima,<sup>10</sup> Hiroaki Matsumoto,<sup>11</sup> Mei Chen,<sup>12</sup> Mengran Li,<sup>13\*</sup> Kenji Matsuda,<sup>13</sup> Yoshinobu Tanaka,<sup>13</sup> Brian I. Rini,<sup>14</sup> Hirotsugu Uemura<sup>15</sup>

<sup>1</sup>Bell Land General Hospital, Osaka, Japan; <sup>2</sup>Toranomon Hospital, Tokyo, Japan; <sup>3</sup>National Cancer Center Hospital East, Kashiwa, Japan; <sup>4</sup>Keio University Hospital, Tokyo, Japan; <sup>5</sup>Nippon Medical School Hospital, Tokyo, Japan; <sup>6</sup>Nara Medical University Hospital, Kashihara, Japan; <sup>7</sup>Niigata University Medical & Dental Hospital, Niigata, Japan; <sup>8</sup>Saitama Medical University International Medical Center, Saitama Japan, <sup>9</sup>Sapporo Medical University, Sapporo, Japan; <sup>10</sup>University of Tsukuba, Tsukuba, Japan; <sup>11</sup>Yamaguchi University, Yamaguchi, Japan; <sup>12</sup>Merck & Co., Inc., Kenilworth, NJ, USA; <sup>13</sup>MSD K.K., Tokyo, Japan; <sup>14</sup>Cleveland Clinic Taussig Cancer Institute, Cleveland, OH, USA; currently at Vanderbilt-Ingram Cancer Center, Nashville, TN, USA; <sup>15</sup>Kindai University, Osaka, Japan

\*At the time the study was conducted

Corresponding author

Satoshi Tamada

Higashiyama 500-3, Naka-ku, Sakai City, Osaka, 599-8247, Japan

satoshitamada@osaka.med.or.jp

**Supplementary Table 1** Baseline patient characteristics of the Japanese population

|                                                                 | Japanese Population                             |                               | Global Population                                |                                |
|-----------------------------------------------------------------|-------------------------------------------------|-------------------------------|--------------------------------------------------|--------------------------------|
|                                                                 | Pembrolizumab +<br>Axitinib<br>( <i>n</i> = 44) | Sunitinib<br>( <i>n</i> = 50) | Pembrolizumab +<br>Axitinib<br>( <i>n</i> = 432) | Sunitinib<br>( <i>n</i> = 429) |
| Male, n (%)                                                     | 36 (82)                                         | 39 (78)                       | 308 (71)                                         | 320 (75)                       |
| Age, years, median<br>(range/IQR) <sup>a</sup>                  | 66 (43–84)                                      | 65 (39–90)                    | 62 (55–68)                                       | 61 (53–68)                     |
| Age, n (%)                                                      |                                                 |                               |                                                  |                                |
| <65                                                             | 20 (45)                                         | 25 (50)                       | 260 (60)                                         | 278 (65)                       |
| ≥65                                                             | 24 (55)                                         | 25 (50)                       | 172 (40)                                         | 151 (35)                       |
| Karnofsky Performance<br>Status Scale score, n (%) <sup>b</sup> |                                                 |                               |                                                  |                                |
| 90/100                                                          | 39 (89)                                         | 48 (96)                       | 346 (80)                                         | 341 (79)                       |
| 70/80                                                           | 5 (11)                                          | 2 (4)                         | 85 (20)                                          | 88 (21)                        |
| IMDC risk category, n (%)                                       |                                                 |                               |                                                  |                                |
| Favorable                                                       | 19 (43)                                         | 16 (32)                       | 138 (32)                                         | 131 (31)                       |
| Intermediate/poor                                               | 25 (57)                                         | 34 (68)                       | 294 (68)                                         | 298 (69)                       |
| PD-L1 status, n (%)                                             |                                                 |                               |                                                  |                                |
| CPS ≥1                                                          | 25 (57)                                         | 31 (62)                       | 242 (56)                                         | 253 (59)                       |
| CPS <1                                                          | 19 (43)                                         | 18 (36)                       | 165 (38)                                         | 156 (36)                       |
| Missing                                                         | 0                                               | 1 (2)                         | 25 (6)                                           | 20 (5)                         |
| Sarcomatoid feature, n (%)                                      | 7 (16)                                          | 5 (10)                        | 51 (12)                                          | 54 (13)                        |

*CPS* combined positive score; *IMDC* International Metastatic Renal Cell Carcinoma Database Consortium; *IQR*

interquartile range; *PD-L1* programmed death-ligand 1

<sup>a</sup>Range in the Japanese population; IQR in the global population

<sup>b</sup>One patient had missing information in the global population (pembrolizumab-axitinib group)

**Supplementary Table 2** Subsequent therapy after study drug discontinuation in the Japanese population

| n (%)                                                                                  | Pembrolizumab + Axitinib<br>(n = 44) | Sunitinib<br>(n = 50) |
|----------------------------------------------------------------------------------------|--------------------------------------|-----------------------|
| Discontinued study treatment                                                           | 33 (75)                              | 42 (84)               |
| Received any subsequent systemic anticancer therapy after discontinuation <sup>a</sup> | 24 (73)                              | 39 (93)               |
| Any VEGF/VEGFR inhibitor <sup>b</sup>                                                  | 18 (55)                              | 26 (62)               |
| Nivolumab <sup>c</sup>                                                                 | 4 (12)                               | 28 (67)               |
| Other type <sup>d</sup>                                                                | 6 (18)                               | 4 (10)                |
| 1 subsequent line                                                                      | 24 (73)                              | 39 (93)               |
| 2 subsequent lines                                                                     | 6 (18)                               | 19 (45)               |
| ≥3 subsequent lines                                                                    | 1 (3)                                | 6 (14)                |

*PD-L1* programmed death ligand 1; *VEGF* vascular endothelial growth factor; *VEGFR* vascular endothelial growth factor receptor

<sup>a</sup>Percentages are calculated with 33 discontinuations as the denominator

<sup>b</sup>Axitinib, cabozantinib, pazopanib, sorafenib, or sunitinib

<sup>c</sup>Only PD-L1 inhibitor used as subsequent therapy

<sup>d</sup>Everolimus, interferon (unspecified), investigational drug (unspecified), ipilimumab, temsirolimus.

**Supplementary Table 3** Adverse events (AEs) of interest

| AEs of interest       | Pembrolizumab-axitinib ( <i>n</i> = 44) |           |           | Sunitinib ( <i>n</i> = 49) |           |           |
|-----------------------|-----------------------------------------|-----------|-----------|----------------------------|-----------|-----------|
|                       | Any grade                               | Grade 1/2 | Grade 3/4 | Any grade                  | Grade 1/2 | Grade 3/4 |
| Any                   | 28 (63.6)                               | 20 (45.5) | 8 (18.2)  | 26 (53.1)                  | 26 (53.1) | 0         |
| Hypothyroidism        | 15 (34.1)                               | 15 (34.1) | 0         | 21 (42.9)                  | 21 (42.9) | 0         |
| Hyperthyroidism       | 7 (15.9)                                | 7 (15.9)  | 0         | 2 (4.1)                    | 2 (4.1)   | 0         |
| Adrenal insufficiency | 5 (11.4)                                | 5 (11.4)  | 0         | 0                          | 0         | 0         |
| Colitis               | 5 (11.4)                                | 2 (4.5)   | 3 (6.8)   | 0                          | 0         | 0         |
| Pneumonitis           | 3 (6.8)                                 | 2 (4.5)   | 1 (2.3)   | 1 (2.0)                    | 1 (2.0)   | 0         |
| Thyroiditis           | 3 (6.8)                                 | 3 (6.8)   | 0         | 2 (4.1)                    | 2 (4.1)   | 0         |
| Myasthenic syndrome   | 2 (4.5)                                 | 2 (4.5)   | 0         | 0                          | 0         | 0         |
| Myositis              | 2 (4.5)                                 | 2 (4.5)   | 0         | 0                          | 0         | 0         |
| Hepatitis             | 1 (2.3)                                 | 0         | 1 (2.3)   | 0                          | 0         | 0         |
| Hypophysitis          | 1 (2.3)                                 | 0         | 1 (2.3)   | 0                          | 0         | 0         |
| Infusion reactions    | 1 (2.3)                                 | 1 (2.3)   | 0         | 1 (2.0)                    | 1 (2.0)   | 0         |
| Myocarditis           | 1 (2.3)                                 | 0         | 1 (2.3)   | 0                          | 0         | 0         |
| Nephritis             | 1 (2.3)                                 | 1 (2.3)   | 0         | 1 (2.0)                    | 1 (2.0)   | 0         |
| Severe skin reactions | 1 (2.3)                                 | 0         | 1 (2.3)   | 1 (2.0)                    | 1 (2.0)   | 0         |
| Uveitis               | 1 (2.3)                                 | 1 (2.3)   | 0         | 0                          | 0         | 0         |

Data are *n* (%) and are from the as-treated population.

**Supplementary Figure 1.** Patient disposition of the Japanese population. *AE* adverse event; *CR* complete response; *PD* progressive disease

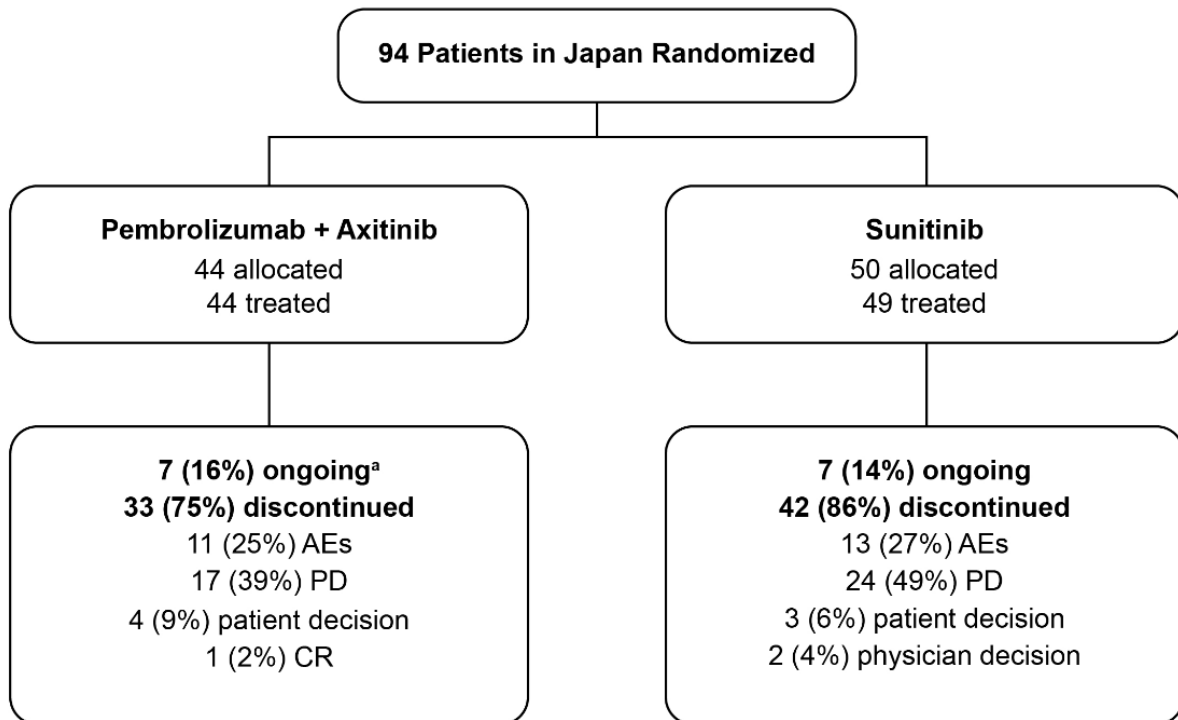

<sup>a</sup>Four patients completed 2 full years of pembrolizumab.
